# Supplementary material for: Crystal structure of Zika virus NS5 RNA-dependent RNA polymerase
Source: PubMed Central journal article supplement (PMC5378953; doi:10.1038/ncomms14764), 2017-03-27
Supplement: ncomms14764-s1.pdf [file ncomms14764-s1.pdf]

**Supplementary Note 1**

**Codon optimized sequence of ZIKV RdRp**

TACCATGGGAGCTACGAAGCCCCACGCAAGGATCAGCGTCTTCCCTCGTGA  
ACGGGGTTGTAGACTCCTGTCAAAGCCTTGGGACGTGGTGACTGGAGTTAC  
AGGAATAGCCATGACTGACACCACACCATACGGCCAACAAAGAGTCTTCAA  
GAAAAAGTGGACACCAGGGTGCCAGATCCCCAAGAAGGCACTCGCCAGGTA  
ATGAACATAGTCTCTTCCCTGGCTGTGGAAGGAGCTGGGGAAACGCAAGCGG  
CACGCGTCTGCACCAAAGAAGAGTTTATCAACAAGGTGCGCAGCAATGCAGC  
ACTGGGAGCAATATTTGAAGAGGAAAAAGAATGGAAGACGGCTGTGGAAGC  
TGTGAATGATCCAAGTTTTGGGCCCTAGTGGATAGGGAGAGAGAACCAC  
CTGAGAGGAGAGTGTACAGCTGTGTGTACAACATGATGGGAAAAAGAGAA  
AAGAAGCAAGGAGAGTTCGGGAAAGCAAAAGGTAGCCGCGCCATCTGGTAC  
ATGTGGTTGGGAGCCAGATTCTTGGAGTTTGAAGCCCTTGGATTCTTGAACGA  
GGACCATTGGATGGGAAGAGAAAACCTCAGGAGGTGGAGTCGAAGGGTTAGG  
ATTGCAAAGACTTGGATACATTCTAGAAGAAATGAATCGGGCACCAGGAGGA  
AAGATGTACGCAGATGACTGCTGGCTGGGACACCCGCATTAGTAAGTTTG  
ATCTGGAGAATGAAGCTCTGATTACCAACCAAATGGAGGAAGGGCACAGAA  
CTCTGGCGTTGGCCGTGATTAATAACACATACCAAACAAAGTGGTGAAGGT  
TCTCAGACCAGCTGAAGGAGGAAAAACAGTTATGGACATCATTTCAAGACAA  
GACCAGAGAGGGAGTGGACAAGTTGTCACTTATGCTCTCAACACATTCACCA  
ACTTGGTGGTGCAGCTTATCCGGAACATGGAAGCTGAGGAAGTGTTAGAGAT  
GCAAGACTTATGGTTGTTGAGGAAGCCAGAGAAAGTGACCAGATGGTTGCAG  
AGCAATGGATGGGATAGACTCAAACGAATGGCGGTTCAGTGGAGATGACTGC  
GTTGTGAAGCCAATCGATGATAGGTTTGCACATGCCCTCAGGTTCTTGAATGA  
CATGGGAAAAGTTAGGAAAGACACACAGGAGTGGAAACCCTCGACTGGATG  
GAGCAATTGGGAAGAAGTCCCGTTCTGCTCCCACCACTTCAACAAGCTGTAC  
CTCAAGGATGGGAGATCCATTGTGGTCCCTTGCCGCCACCAAGATGAACTGA  
TTGGCCGAGCTCGCGTCTCACCAAGGGGCAGGATGGAGCATCCGGGAGACTGC  
CTGTCTTGCAAAATCATATGCGCAGATGTGGCAGCTCCTTTATTTCCACAGAA  
GAGACCTTCGACTGATGGCTAATGCCATTTGCTCGGCTGTGCCAGTTGACTGG  
GTACCAACTGGGAGAACCACCTGGTCAATCCATGGAAAGGGAGAATGGATG  
ACCACTGAGGACATGCTCATGGTGTGGAATAGAGTGTGGATTGAGGAGAACG  
ACCATATGGAGGACAAGACTCCTGTAACAAAATGGACAGACATTCCTATCT  
AGGAAAAGGGAGGACTTATGGTGTGGATCCCTTATAGGGCACAGACCCCGC  
ACCACTTGGGCTGAAAACATCAAAGACACAGTCAACATGGTGCAGGATCA  
TAGGTGATGAAGAAAAGTACATGGACTATCTATCCACCAAGTCCGCTACTT  
GGGTGAGGAAGGGTCCACACCCGGAGTGTTG

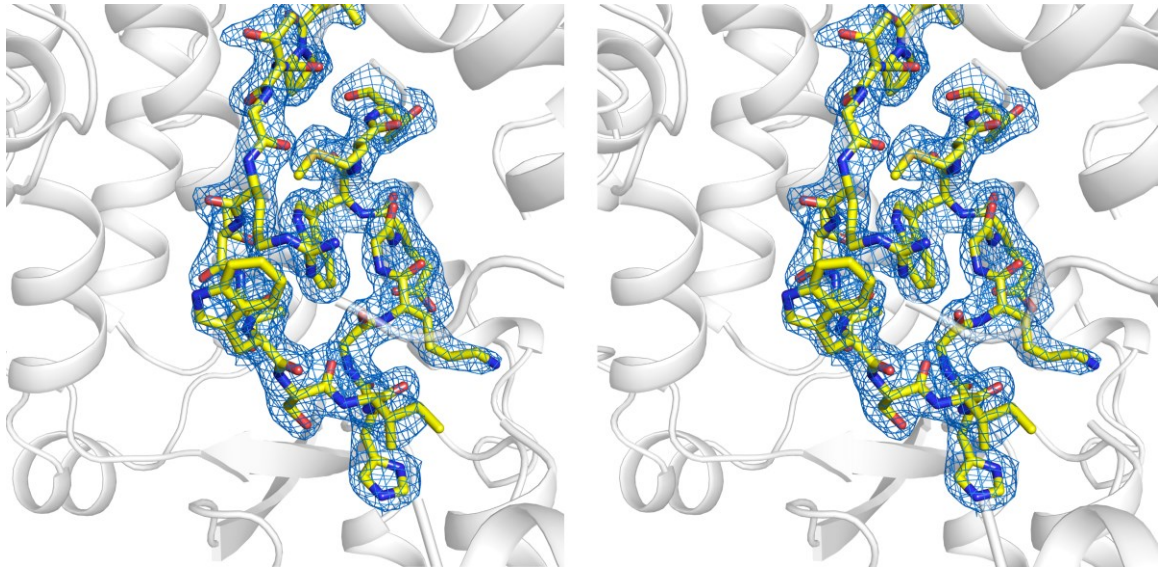

**Supplementary Figure 1:** Stereo view of the priming loop electron density map ( $2F_o - F_c$ ) of ZIKV NS5 RdRp, with 1.0 sigma.
